# Supplementary material for: Subsidy and Environmental Tax for Construction and Demolition Waste Recycling
Source: Research Square preprint supplement (doi:10.21203/rs.3.rs-1014164/v1), 2021-12-29
Supplement: Supplementary file 1 [file 0ded26b02a31e04de20082bb.docx]

**Appendix**

**Table A1**

Constant variables

| Constant variables | Value | Unit | Data source |
| --- | --- | --- | --- |
| The initial amount of recycled C&D waste |  | Ton / Year | The amount of recycled C&D waste, directly dumped C&D waste and illegal dumping C&D waste are set at 13%, 84%, and 3%, respectively (Jia & Yan, 2018). |
| The initial amount of directly dumped C&D waste |  | Ton / Year |
| The initial amount of illegal dumping C&D waste | 897000 | Ton / Year |
| Cost of illegal dumping | 10 | Yuan / Ton | Yuan & Wang (2014). |
| Fine | 100 | Yuan / Ton | Jia et al. (2017) and Jia & Yan (2018). |
| Landfill fee | 11 | Yuan / Ton | Notice on the Implementation of Government-guided Prices for Transportation and Disposal fees for Construction and Demolition waste in Pudong New Area |
| Transportation fee | 18 | Yuan / Ton | Yuan & Wang (2014). |

**Table A2**

Auxiliary variable

| Auxiliary variable | Equation |
| --- | --- |
| The influence of recycling regulations | Constraints on the amount of C&D waste * 0.2 + Constraints for directly dumped waste * 0.2+ Driving factors for C&D recycling * 0.3 + Constraints on illegal dumping of C&D waste * 0.3 |
| Effectiveness of recycling regulations execution | (Emission reduction effect * 0.5 + Integrity of regulations * 0.25 + Effectiveness of supervision * 0.25) * The influence of recycling regulations |
| Price of illegal dumping | Fine * Probability of being caught + Cost of illegal dumping |
| Increment of illegal dumping C&D waste | Amount of annual generated C&D waste * Proportion of illegal dumping C&D waste |
| Cost of C&D waste recycling | Recycled fee-Exempted environmental tax-Subsidy |
| Increment of recycled C&D waste | Amount of annual generated C&D waste * Proportion of recycled C&D waste |
| Increment of directly dumped C&D waste | Amount of annual generated C&D waste * Proportion of directly dumped C&D waste |
| Cost of directly dumping | (Landfill fee + Environmental tax + Transportation fee) * Effectiveness of recycling regulations execution |

**Table A3**

Table function

| Variable | Table Function |
| --- | --- |
| GDP growth rate | WITH LOOKUP （Time，（[（0，0）-（3000，10）]，（2015，0.1），（2020，0.06），（2030，0.05），（2035，0.045））） |
| Constraints for directly dumped waste | WITH LOOKUP （Amount of directly dumped C&D waste，（[（0，0）-（2e+08，1.1）]，（4e+07，1.01），（1.1e+08，1.03），（3.4e+08，1.04），（7e+08，1.045），（9.6e+08，1.06），（1.3e+09，1.053），（1.9e+09，1.056））） |
| Emission reduction effect | WITH LOOKUP （Environmental tax，（[（0，0）-（250，1）]，（20，0.2），（40，0.5），（60，0.7），（80，0.8），（120，0.65），（160，0.6），（200，0.5），（240，0.3））） |
| Proportion of directly dumped C&D waste | WITH LOOKUP （Cost of directly dumping，（[（0，0）-（140，1）]，（5，0.91），（15，0.81），（40，0.7），（60，0.48），（80，0.24），（100，0.23），（120，0.22），（140，0.21））） |
| Effectiveness of supervision | WITH LOOKUP （Time，（[（2015，0）-（2035，1）]，（2015，0.55），（2020，0.6），（2025，0.7），（2030，0.75）， （2035，0.8））） |
| Integrity of regulations | WITH LOOKUP （Time，（[（2015，0）-（2035，1）]，（2015，0.45），（2020，0.5），（2025，0.55），（2030，0.6），（2035，0.65））） |
| Probability of being caught | WITH LOOKUP （Effectiveness of recycling regulations execution，（[（0，0）-（1，1）]，（0.15，0.15），（0.3，0.2），（0.4，0.25），（0.5，0.35），（0.6，0.4），（0.7，0.5），（0.8，0.6），（0.9，0.7））） |
| Proportion of illegal dumping C&D waste | WITH LOOKUP （Price of illegal dumping，（[（0，0）-（250，0.01）]，（40，0.01），（60，0.009），（90，0.008），（120，0.006），（150，0.004），（180，0.003），（210，0.0028），（240，0.0027））） |
| Constraints on illegal dumping of C&D waste | WITH LOOKUP （Amount of illegal dumping C&D waste，（[（1e+06，1）-（1e+08，1.2）]，（1.4e+06，1.001），（1.1e+07，1.002）， 2.2e+07，1.007），（5.3e+07，1.023），（6e+07，1.024），（9.6e+07，1.031），（1e+08，1.04））） |
| Constraints on the amount of C&D waste | WITH LOOKUP （Amount of annual generated C&D waste，（[（0，0）-（2e+08，1.1）]，（5e+07，1.1），（2.1e+08，1.01），（4e+08，1.02），（6e+08，1.03），（9e+08，1.045），（1.5e+09，1.05），（1.8e+09，1.052））） |
| Market mature degree of recycled materials market | WITH LOOKUP （Effectiveness of recycling regulations execution，（[（0，0）-（1，1）]，（0.2，0.15），（0.3，0.25），（0.4，0.45），（0.5，0.55），（0.6，0.65），（0.7，0.7），（0.8，0.75），（0.9，0.8））） |
| Recycled fee | WITH LOOKUP （Market mature degree of recycled materials market，（[（0，0）-（1，100）]，（0.1，100），（0.2，95），（0.3，90），（0.4，87），（0.5，83），（0.6，78），（0.7，76），（0.8，74））） |
| Proportion of recycled C&D waste | WITH LOOKUP （Cost of C&D waste recycling，（[（50，0）-（120，0.81）]，（55，0.8），（60，0.75），（65，0.65），（70，0.45），（75，0.35），（80，0.3），（85，0.2），（90，0.2），（100，0.15），（110，0.1））） |
| Driving factors for C&D recycling | WITH LOOKUP （The amount of recycled C&D waste，（[（1e+07，1）-（1e+08，1.2）]，（5e+06，1.001），（1.5e+07，1.003），（2.5e+07，1.008），（4e+07，1.015），（6e+07，1.025），（8e+07，1.035），（1e+08，1.05））） |
